# Supplementary material for: Balanced Hybrid Nutrient Density Score Compared to Nutri-Score and Health Star Rating Using Receiver Operating Characteristic Curve Analyses
Source: Front Nutr. 2022 May 2;9:867096. doi: 10.3389/fnut.2022.867096 (PMC9108770; doi:10.3389/fnut.2022.867096)
Supplement: Supplementary file 1 [file Table_1.docx]

Balanced Hybrid Nutrient Density Score (bHNDS) compared to Nutri-Score and Health Star Rating using Receiver Operating Characteristic (ROC) curve analyses

Adam Drewnowski1*, Tanhia D. Gonzalez2, Colin D. Rehm3

1Center for Public Health Nutrition, University of Washington, Seattle, WA, United States

2PepsiCo, Plano, TX, United States

3PepsiCo, Purchase, NY, United States

Supplemental Figures and Tables

**Supplemental Table 1.** Correlation coefficients between bHNDS component scores at the food-level
